# Supplementary material
Source: PubMed Central journal article supplement (PMC8366568)
Supplement: NIHMS917172-supplement-Supplementary_Tables.pdf [file NIHMS917172-supplement-Supplementary_Tables.pdf]

Supplementary Tables. Univariate and multivariate Cox regression analysis.

Recurrence-free survival

| Variable             |        | Univariate  |                  |              | Multivariate |                  |              |
|----------------------|--------|-------------|------------------|--------------|--------------|------------------|--------------|
|                      |        | HR          | 95% CI           | p-value      | HR           | 95% CI           | p-value      |
| Age                  | <65    | ref         |                  |              |              |                  |              |
|                      | >65    | 0.99        | 0.73-1.34        | 0.96         |              |                  |              |
| Gender               | Male   | ref         |                  |              |              |                  |              |
|                      | Female | 0.56        | 0.77-1.59        | 0.56         |              |                  |              |
| ACE-I/ARB            | No     | ref         |                  |              |              |                  |              |
|                      | Yes    | <b>0.66</b> | <b>0.48-0.93</b> | <b>0.009</b> | <b>0.64</b>  | <b>0.47-0.87</b> | <b>0.005</b> |
| Multifocality        | No     | ref         |                  |              |              |                  |              |
|                      | Yes    | 1.14        | 0.85-1.53        | 0.37         |              |                  |              |
| Intravesical therapy | No     | ref         |                  |              |              |                  |              |
|                      | Yes    | 0.86        | 0.59-1.27        | 0.47         |              |                  |              |
| BCG therapy          | No     | ref         |                  |              |              |                  |              |
|                      | Yes    | <b>0.63</b> | <b>0.46-0.85</b> | <b>0.003</b> | <b>0.61</b>  | <b>0.45-0.83</b> | <b>0.002</b> |
| Stage                | Ta     | ref         |                  |              |              |                  |              |
|                      | T1     | 0.71        | 0.49-1.04        | 0.08         |              |                  |              |
|                      | cis    | 0.55        | 0.31-1.03        | 0.06         |              |                  |              |
| Grade                | Low    | ref         |                  |              |              |                  |              |
|                      | High   | 0.8         | 0.6-1.1          | 0.14         |              |                  |              |
| Tumor size           | < 3 cm | ref         |                  |              |              |                  |              |
|                      | > 3 cm | <b>1.4</b>  | <b>1.1-1.9</b>   | <b>0.01</b>  | <b>1.5</b>   | <b>1.1-2</b>     | <b>0.01</b>  |
| Muscle in specimen   | no     | ref         |                  |              |              |                  |              |
|                      | yes    | 0.9         | 0.7-1.3          | 0.68         |              |                  |              |
| Second look TUR      | no     | ref         |                  |              |              |                  |              |
|                      | yes    | 1.1         | 0.7-1.7          | 0.74         |              |                  |              |
| Mitomycin C          | no     | ref         |                  |              |              |                  |              |
|                      | yes    | 0.9         | 0.5-1.4          | 0.62         |              |                  |              |

## Progression-free survival

| Variable             |        | Univariate  |                  |             |
|----------------------|--------|-------------|------------------|-------------|
|                      |        | HR          | 95% CI           | p-value     |
| Age                  | <65    | ref         |                  |             |
|                      | >65    | <b>4.47</b> | <b>0.99-2.01</b> | <b>0.05</b> |
| Gender               | Male   | ref         |                  |             |
|                      | Female | 1.51        | 0.47-4.81        | 0.48        |
| ACE-I/ARB            | No     | ref         |                  |             |
|                      | Yes    | 0.62        | 0.19-1.97        | 0.41        |
| Multifocality        | No     | ref         |                  |             |
|                      | Yes    | <b>3.51</b> | <b>1.1-11.2</b>  | <b>0.03</b> |
| Intravesical therapy | No     | ref         |                  |             |
|                      | Yes    | 2.43        | 0.81-7.28        | 0.11        |
| BCG therapy          | No     | ref         |                  |             |
|                      | Yes    | 2.08        | 0.71-6.74        | 0.17        |
| Stage                | Ta     | ref         |                  |             |
|                      | T1     | 0.036       | 0.05-2.85        | 0.33        |
|                      | cis    | 2.67        | .073-9.81        | 0.13        |
| Grade                | Low    | ref         |                  |             |
|                      | High   | 2.14        | 0.72-6.33        | 0.17        |
| Tumor size           | < 3 cm | ref         |                  |             |
|                      | > 3 cm | 0.3         | 0.1-1.4          | 0.13        |
| Muscle in specimen   | no     | ref         |                  |             |
|                      | yes    | 1.1         | 0.3-3.6          | 0.87        |
| Second look TUR      | no     | ref         |                  |             |
|                      | yes    | 1.7         | 0.4-7.9          | 0.48        |
| Mitomycin C          | no     | ref         |                  |             |
|                      | yes    | 2.7         | 0.7-10.1         | 0.13        |

\* No significance detected on multivariate analysis for PFS.
